# Supplementary material for: A thermodynamic investigation of the LiBH4–NaBH4 system
Source: Royal Society of Chemistry journal article supplement (doi:10.1039/c6ra09301a), 2016-01-01
Supplement: c6ra09301a1.pdf [file c6ra09301a1.pdf]

# A thermodynamic investigation of the $\text{LiBH}_4\text{-NaBH}_4$ system

Erika M. Dematteis,<sup>a)b)</sup> Elsa Roedern,<sup>b)</sup> Eugenio R. Pinatel,<sup>a)</sup> Marta Corno,<sup>a)</sup> Torben R. Jensen <sup>b)</sup>and

Marcello Baricco<sup>a)\*</sup>

<sup>a)</sup>Department of Chemistry and Inter-departmental Center Nanostructured Interfaces and Surfaces (NIS)  
University of Turin, Via Pietro Giuria 7, 10125 Torino, Italy

<sup>b)</sup>Department of Chemistry, Center for Materials Crystallography (CMC) and Interdisciplinary Nanoscience  
Center (iNANO) Aarhus University, Langelandsgade 140, DK-8000 Aarhus C, Denmark

## SUPPLEMENTARY INFORMATION

**Table S1 – ICP (elemental analysis) data for  $\text{LiBH}_4$  (starting material) expressed as the relative contents of B and Li.**

| <b>B</b><br><b>(mg/kg)</b> | <b>Li</b><br><b>(mg/kg)</b> | <b>B</b><br><b>(mmol/kg)</b> | <b>Li</b><br><b>(mmol/kg)</b> | <b>Purity</b><br><b>(ICP)</b> |
|----------------------------|-----------------------------|------------------------------|-------------------------------|-------------------------------|
| 0.551                      | 0.355                       | 0.0510                       | 0.0511                        | >99 %                         |

**Table S2 – All DSC data. The area value reported in red were obtained from the integration of the double peak.**

| Sample      | LiBH <sub>4</sub><br>mol% | Peak Area (J/g)  |            |            |            | Tonset (°C)      |         |                  |         |          |
|-------------|---------------------------|------------------|------------|------------|------------|------------------|---------|------------------|---------|----------|
|             |                           | Phase Transition |            | Melting    |            | Phase Transition |         | Melting eutectic |         | Liquidus |
|             |                           | heating          | cooling    | heating    | cooling    | heating          | cooling | heating          | cooling | cooling  |
| <b>s1</b>   | 10                        | 13               |            | 5          |            | 95               |         | 215              |         |          |
| <b>s2</b>   | 20                        | 25               | 18         | 24         | 21         | 95               | 85      | 218              | 217     |          |
| <b>s3</b>   | 30                        | 39               | 35         | 47         | 46         | 94               | 85      | 217              | 217     |          |
| <b>s4</b>   | 40                        | 59               |            | 75         |            | 94               |         | 217              |         |          |
| <b>s5</b>   | 50                        | 69               | 75         | 123        | 125        | 94               | 86      | 216              | 217     |          |
| <b>s6</b>   | 60                        | 101              | 101        | <b>230</b> | <b>269</b> | 94               | 84      | 215              | 214     | 280      |
| <b>s6.2</b> | 62                        | 116              | 112        | <b>254</b> | <b>276</b> | 94               | 86      | 215              | 217     | 270      |
| <b>s6.5</b> | 65                        | 109              | 123        | <b>224</b> | <b>213</b> | 95               | 86      | 216              | 219     |          |
| <b>s7</b>   | 70                        | 135              | 133        | 263        | 255        | 95               | 86      | 215              | 217     |          |
| <b>s7.5</b> | 75                        | 145              | 151        | <b>225</b> | <b>224</b> | 94               | 86      | 214              |         | 221      |
| <b>s8</b>   | 80                        | <b>146</b>       | <b>168</b> | <b>259</b> | <b>216</b> | 94               | 86      | 217              |         | 227      |
| <b>s9</b>   | 88                        | <b>167</b>       | <b>212</b> | <b>307</b> | <b>274</b> | 95               | 85      | 227              |         | 247      |
| <b>s9.5</b> | 95                        | <b>171</b>       | <b>173</b> | <b>482</b> | <b>338</b> | 94               | 90      |                  |         | 259      |
| <b>s9.8</b> | 98                        | <b>203</b>       | <b>171</b> | <b>344</b> | <b>389</b> | 95               | 98      |                  |         | 268      |

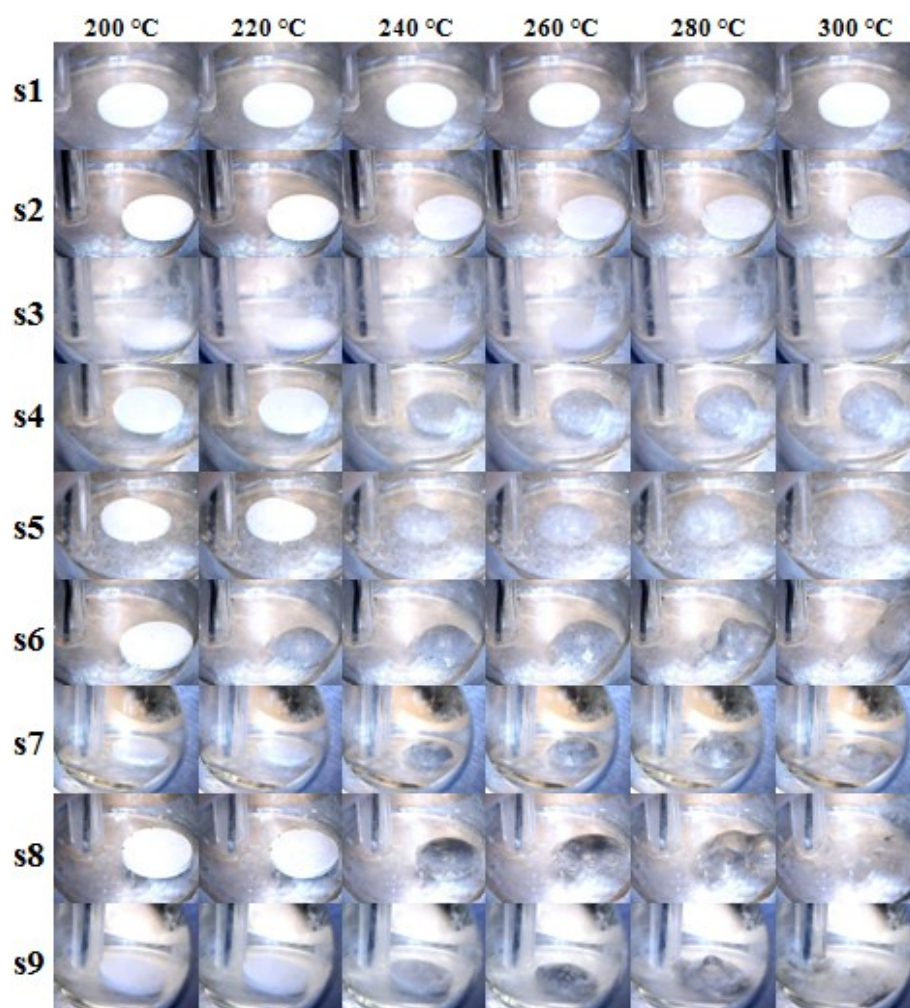

**Figure S1 – All data from Temperature programmed photographic analysis (TPPA),  $\Delta T/\Delta t = 5$  °C/min, argon atmosphere, temperature range 200-300 °C.**

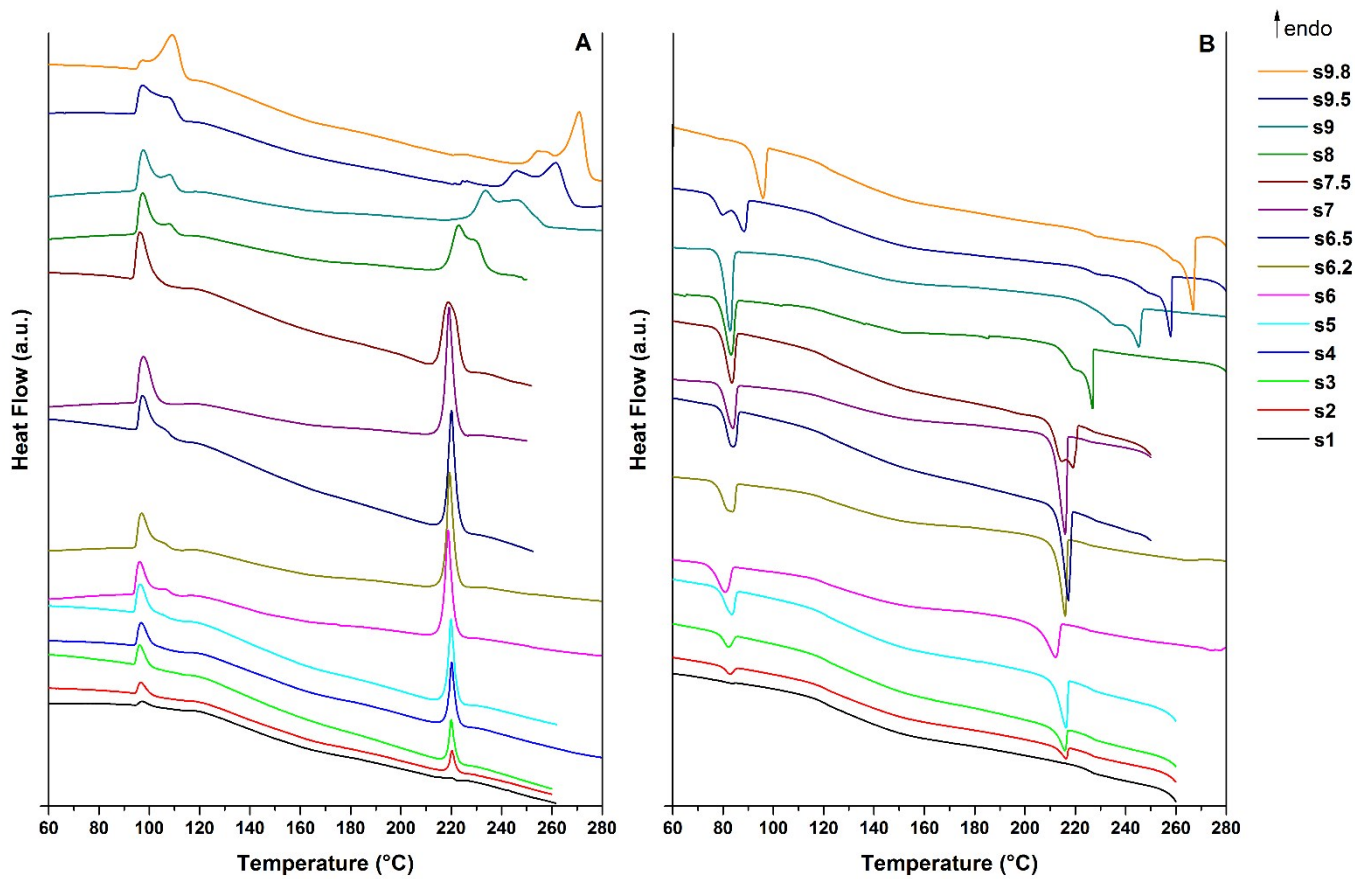

**Figure S2 – Offset data from DSC measurements,  $\Delta T/\Delta t = 5\text{ }^{\circ}\text{C}/\text{min}$ , 40 mL/minute argon flow, heating (A) and cooling (B).**

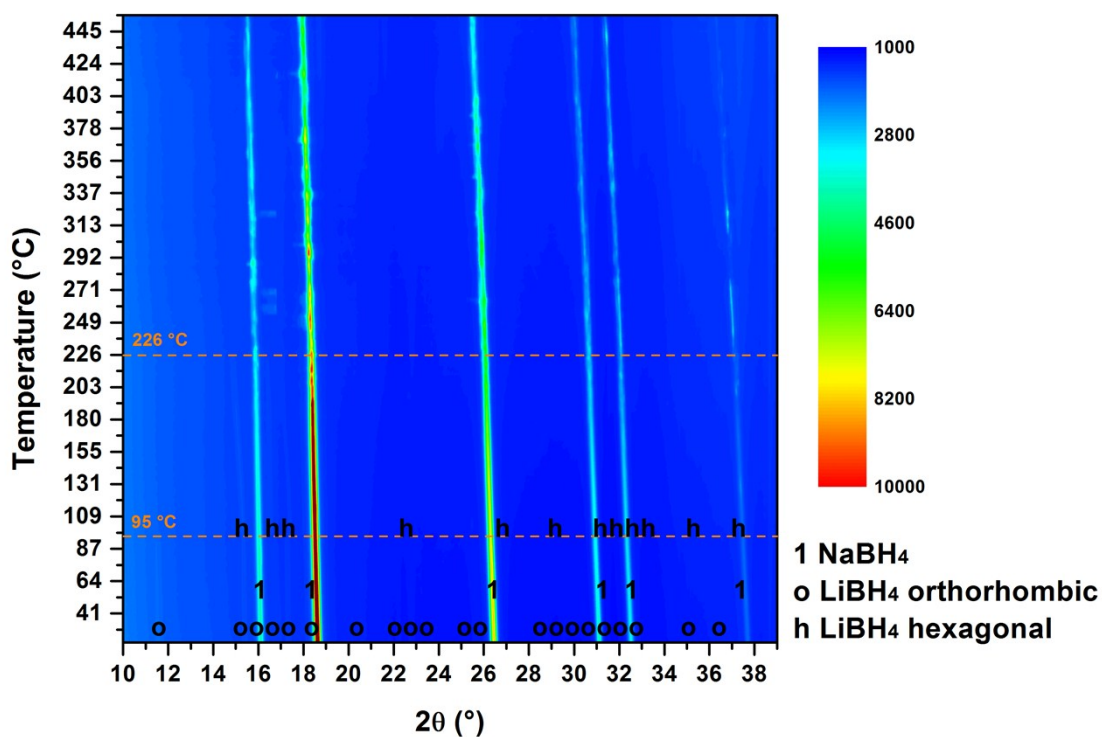

Figure S3 – SR-PXD of s1 ( $\Delta T/\Delta t = 5 \text{ }^\circ\text{C}/\text{min}$ , argon atmosphere, temperature range 25-450  $^\circ\text{C}$ ,  $\lambda=0.9938 \text{ \AA}$ ).

s1 shows the polymorphic transition at 95  $^\circ\text{C}$  and eutectic melting at 226  $^\circ\text{C}$ . Complete melting is not observed, indicating that it happens at temperature higher than 450  $^\circ\text{C}$ .

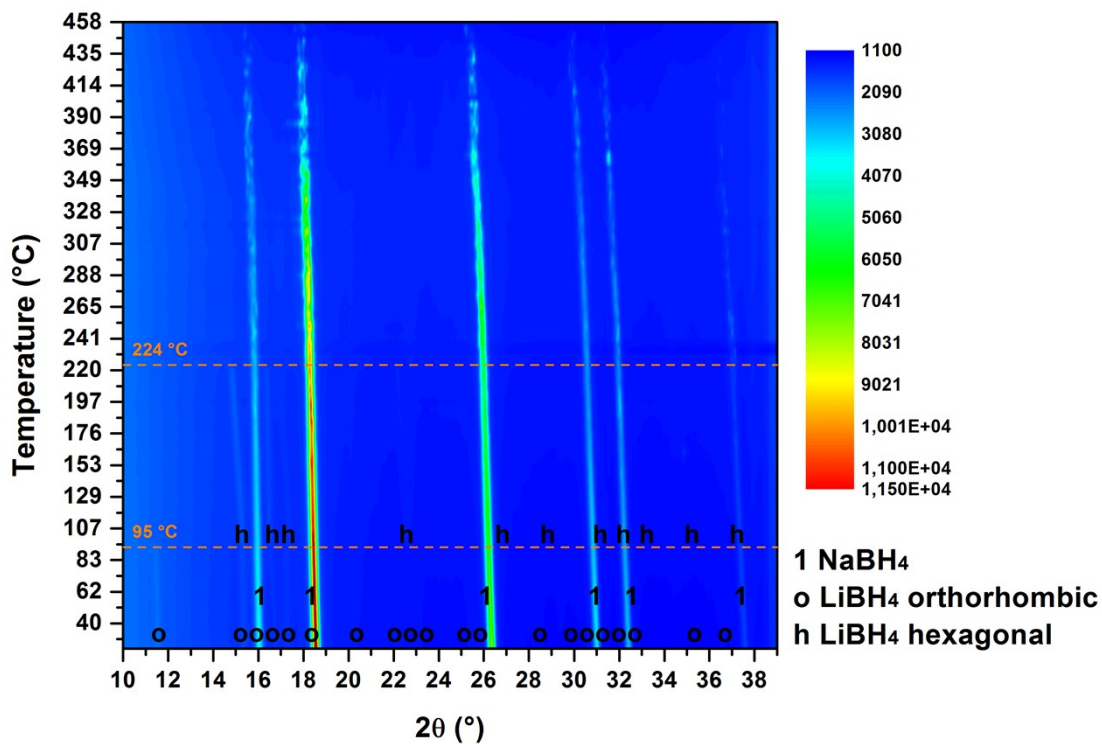

Figure S4 – SR-PXD of s2 ( $\Delta T/\Delta t = 5 \text{ }^\circ\text{C}/\text{min}$ , argon atmosphere, temperature range 25-458  $^\circ\text{C}$ ,  $\lambda=0.9938 \text{ \AA}$ ).

s2 shows the polymorphic transition at 95  $^\circ\text{C}$ , the eutectic melting at 224  $^\circ\text{C}$  and the complete melting at 458  $^\circ\text{C}$ .

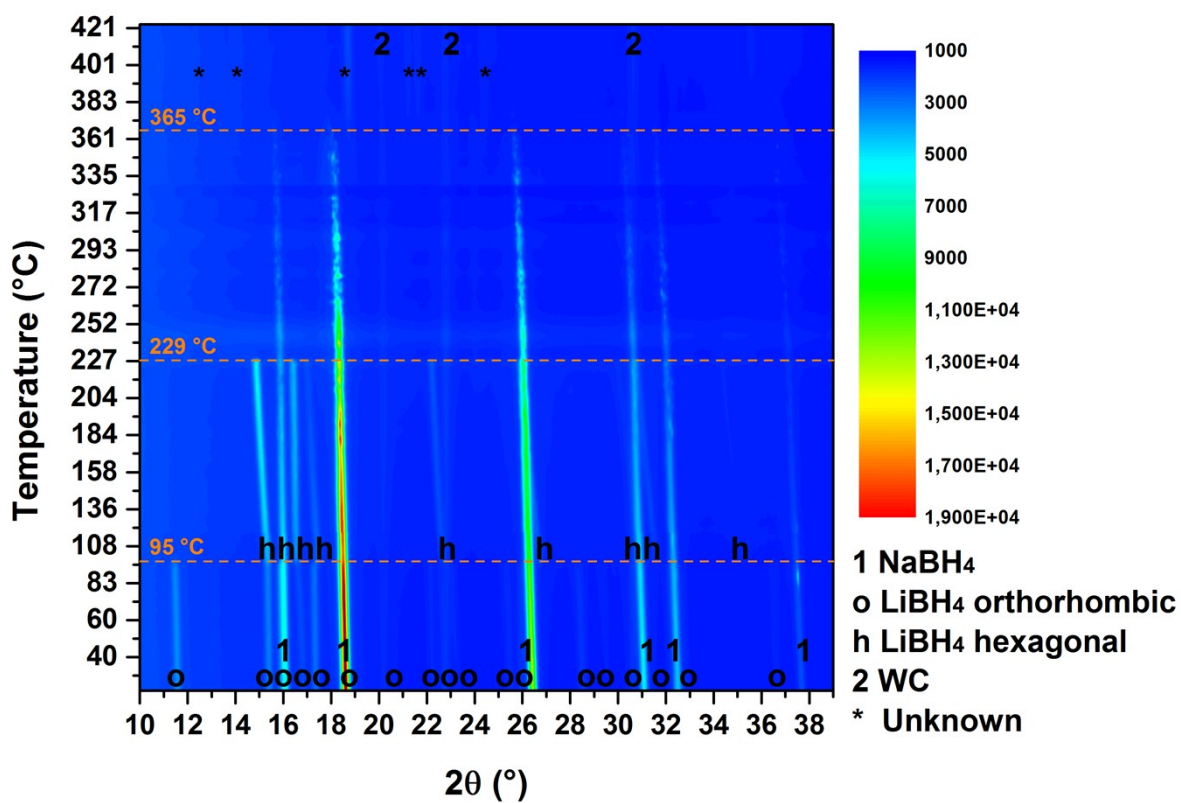

Figure S5 – SR-PXD of s5 ( $\Delta T/\Delta t = 5$  °C/min, argon atmosphere, temperature range 25-425 °C,  $\lambda=0.9938$  Å).

s5 shows the polymorphic transition at 95 °C, the eutectic melting at 229 °C and the complete melting at 365 °C. Above 365 °C s5 decomposes into an unknown phase.

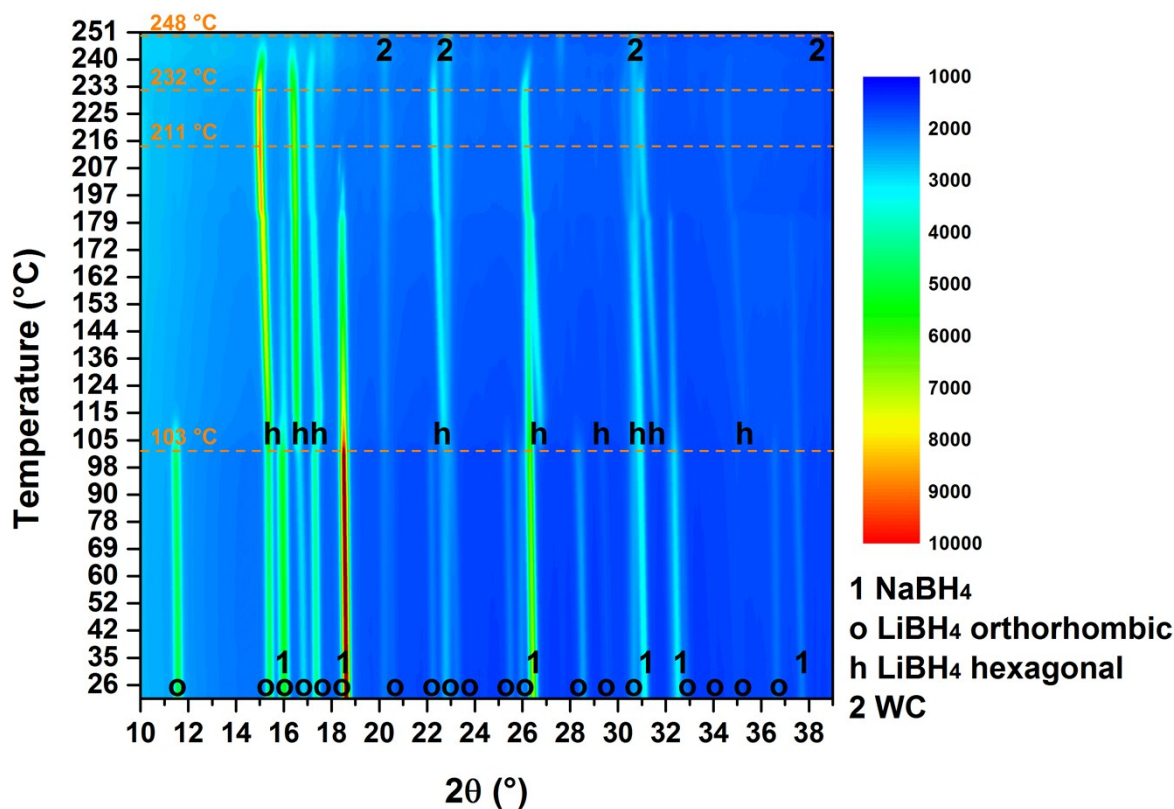

Figure S6 – SR-PXD of s8 ( $\Delta T/\Delta t = 5 \text{ }^\circ\text{C}/\text{min}$ , argon atmosphere, temperature range 25-251  $^\circ\text{C}$ ,  $\lambda=0.9938 \text{ \AA}$ ).

s8 shows the polymorphic transition at 103  $^\circ\text{C}$ . The reflections from NaBH<sub>4</sub> vanish at 211  $^\circ\text{C}$ , significantly before the melting of the eutectic, indicating the formation of a hexagonal solid solution. Upon further heating, the release of Na from the solid solution is observed at 232  $^\circ\text{C}$ , just before the complete melting at 248  $^\circ\text{C}$ . The unit cell parameter of hexagonal solid solution decreases significantly, as NaBH<sub>4</sub> is expelled from the structure, due to a reduced solubility during the melting of the mixture.



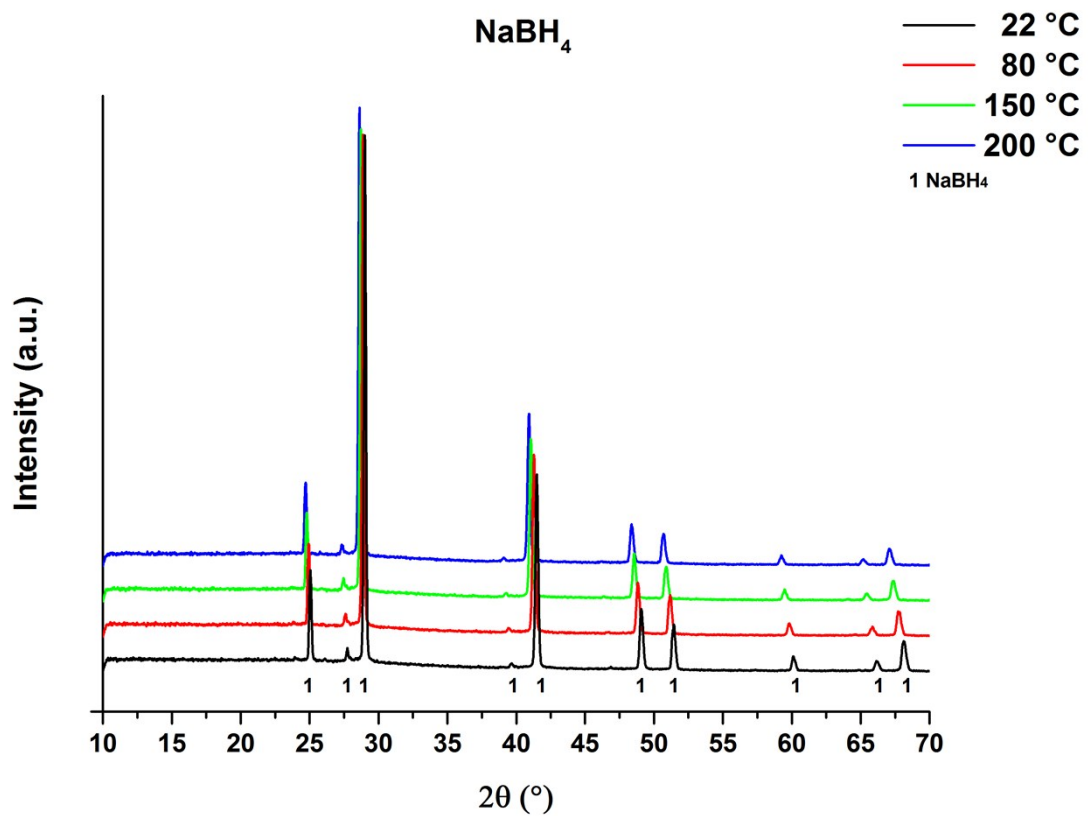

**Figure S7 – HT-PXD of NaBH<sub>4</sub> at different temperatures in equilibrium condition ( $\lambda=1.54059$  Å).**

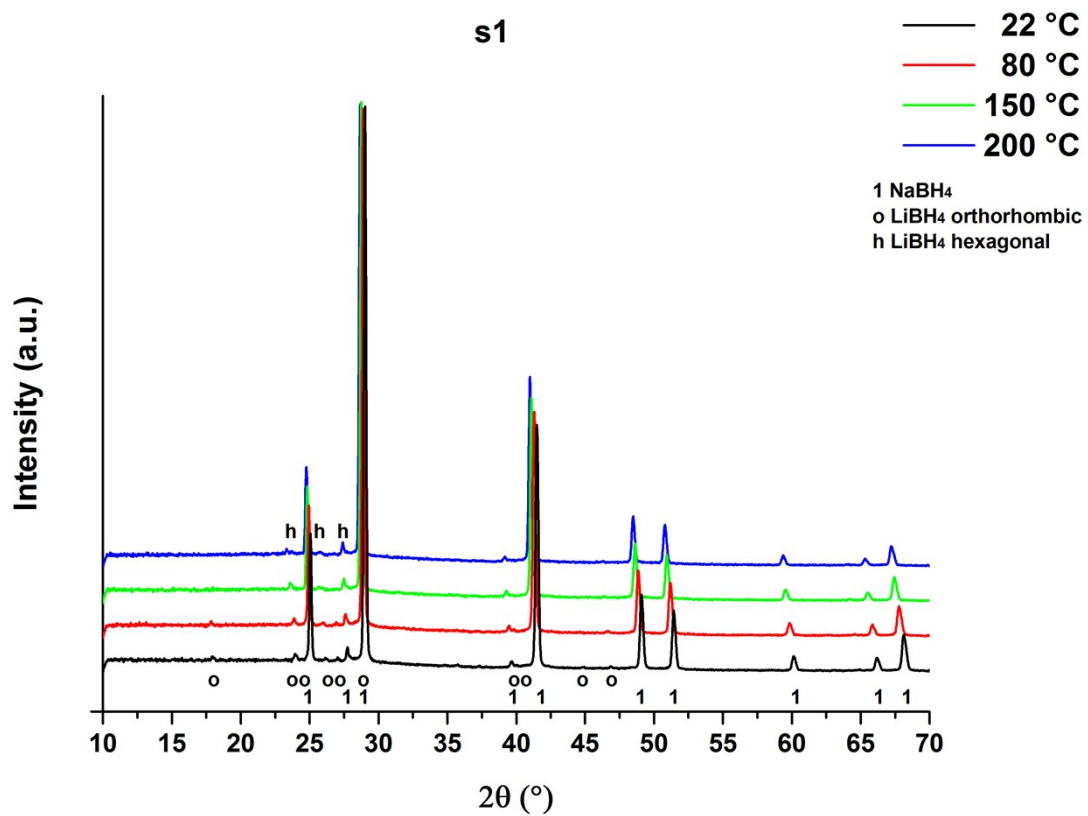

**Figure S8 – HT-PXD of s1 at different temperatures in equilibrium condition ( $\lambda=1.54059 \text{ \AA}$ ).**

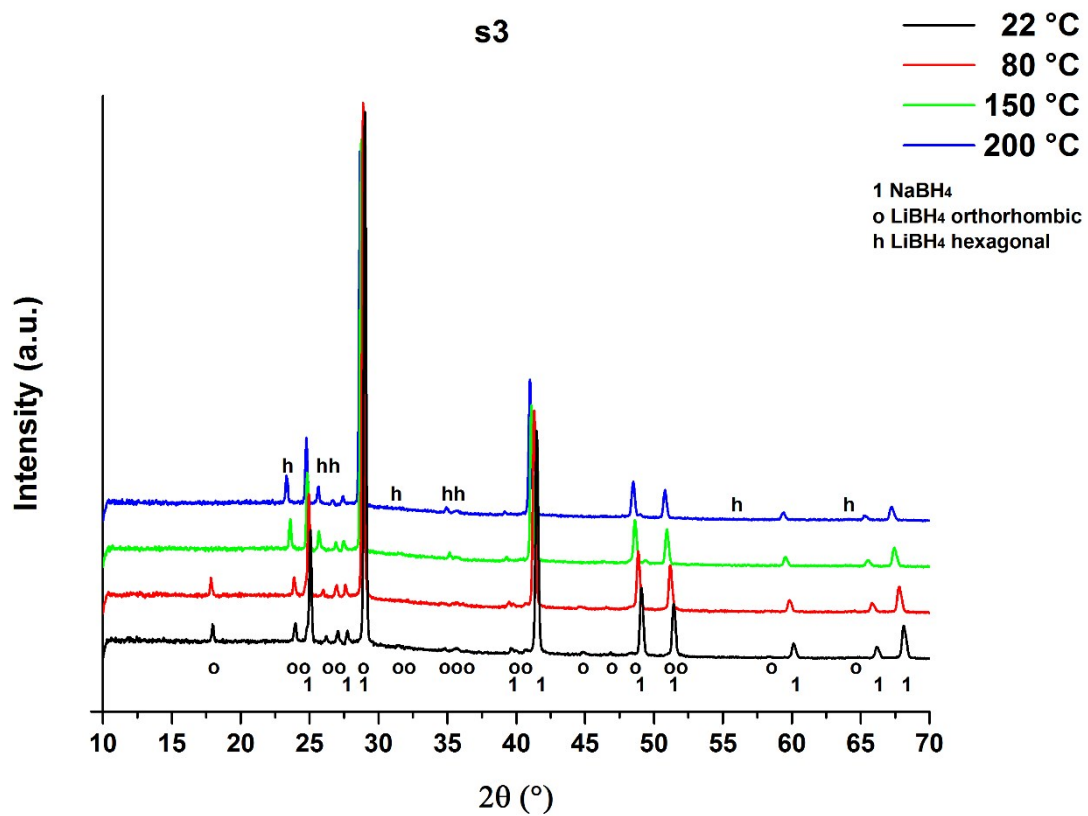

**Figure S9 – HT-PXD of s3 at different temperatures in equilibrium condition ( $\lambda=1.54059 \text{ \AA}$ ).**

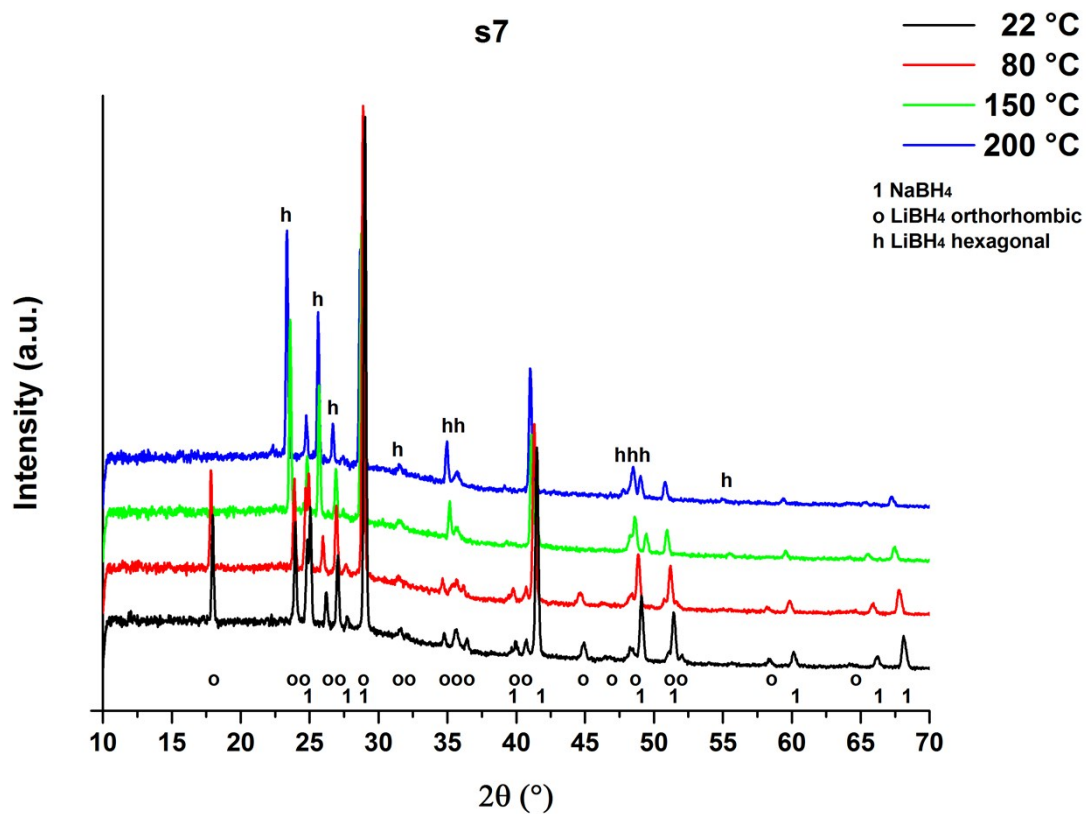

Figure S10 – HT-PXD of s7 at different temperatures in equilibrium condition ( $\lambda=1.54059 \text{ \AA}$ ).

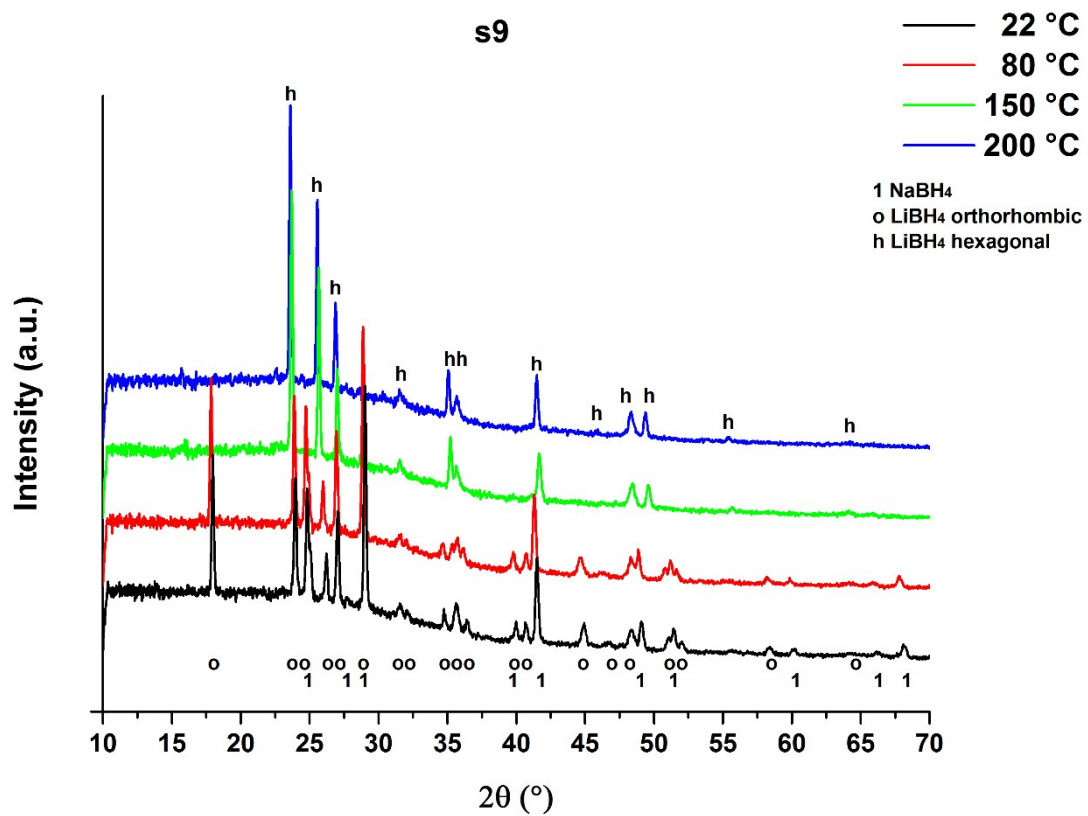

Figure S11 – HT-PXD of s9 at different temperatures in equilibrium condition ( $\lambda=1.54059 \text{ \AA}$ ).

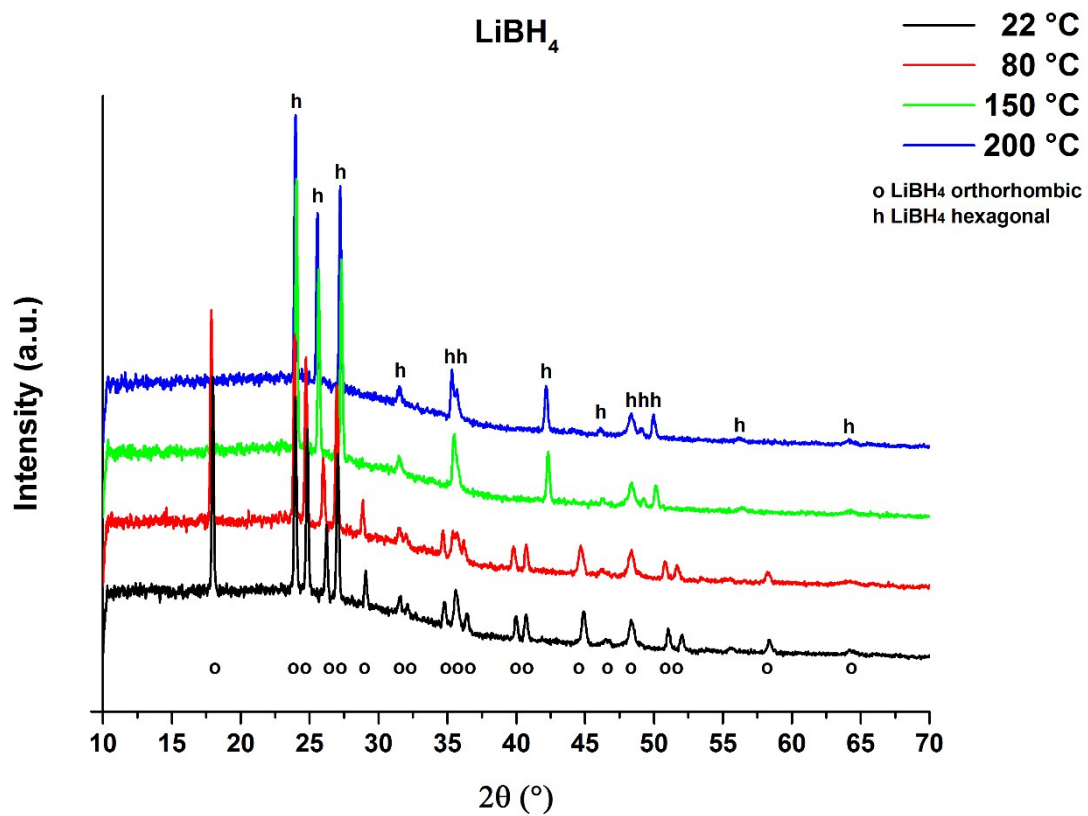

Figure S12 – HT-PXD of  $\text{LiBH}_4$  at different temperatures in equilibrium condition ( $\lambda=1.54059 \text{ \AA}$ ).
